# Supplementary material
Source: publisher figshare collection journal article supplement (https://sage.figshare.com/ndownloader/files/17470646)
Supplement: Supplementary file 1 [file 17470646]

**APPENDIX A** *Overview cutback measures (continued on next page)*

| Most important measures of the “Masterplan DJI” | Explanation                                                                                |                                                                                                             | Estimated budgetary reduction in millions in 2018 <sup>i</sup> |                                       |
|-------------------------------------------------|--------------------------------------------------------------------------------------------|-------------------------------------------------------------------------------------------------------------|----------------------------------------------------------------|---------------------------------------|
|                                                 | Masterplan I                                                                               | Masterplan II                                                                                               | Masterplan I                                                   | Masterplan II                         |
| Closing prisons                                 | Closing down 26 prison locations (out of 55), Reduction of 3400 FTE.                       | Closing down 19 prison locations (out of 55), Reduction of 2000 FTE.                                        | 92 + 29<br>(sum of two measures below)                         | 16 +31<br>(sum of two measures below) |
| Electronic detention                            | Making use of electronic detention so that detainees can fulfil their prison time at home. | Making use of electronic detention for a limited amount of inmates, who are allowed to work outside prison. | 92                                                             | 16                                    |
| Increased number of multi-person cells          | Increasing the number of inmates that are sharing a cell, from 1431 to 2856.               | Increasing the number of inmates that are sharing a cell, from 1431 to 3060.                                | 29                                                             | 31                                    |
| Austerity measures prison regimes               | Less time for sports, leisure, and work (which are relatively expensive) for detainees.    | Less time for sports, leisure, and work (which are relatively expensive) for detainees.                     | 10                                                             | 8                                     |
| Reduction of the reserve capacity               | Decreasing the backup capacity of prison cells.                                            | Decreasing the backup capacity of prison cells.                                                             | 11                                                             | 11                                    |

| Most important measures of the “Masterplan DJI”                         | Explanation                                                                                |                                                                                            | Estimated budgetary reduction in millions in 2018 <sup>ii</sup> |               |
|-------------------------------------------------------------------------|--------------------------------------------------------------------------------------------|--------------------------------------------------------------------------------------------|-----------------------------------------------------------------|---------------|
|                                                                         | Masterplan I                                                                               | Masterplan II                                                                              | Masterplan I                                                    | Masterplan II |
| Cutbacks for mental institutions and juvenile penitentiary institutions | Decreasing the number of mental health institutions and juvenile penitentiary institutions | Decreasing the number of mental health institutions and juvenile penitentiary institutions | 56                                                              | 56            |
| Various efficiency cuts                                                 | -                                                                                          | -                                                                                          | 98                                                              | 98            |
| <b>Total amount of cutbacks</b>                                         |                                                                                            |                                                                                            | 343                                                             | 267           |

**APPENDIX B** *List of respondents*

| <b>Organization<sup>iii</sup></b>      | <b>Number of interviewees</b> |
|----------------------------------------|-------------------------------|
| Prisons                                | 7                             |
| Executive Agency DJI                   | 8                             |
| Ministry of Safety & Justice           | 6                             |
| Other civil servants (policy advisors) | 2                             |
| Political principals (not recorded)    | 1                             |
| Other political actors (not recorded)  | 2                             |
| <b>Total</b>                           | 26                            |

## APPENDIX C *Policy documents*

| Document                                           | (Publicly) released                               |
|----------------------------------------------------|---------------------------------------------------|
| 1. Masterplan DJI                                  | March 19 <sup>th</sup> 2013                       |
| 2. Refined Masterplan DJI                          | June 19 <sup>th</sup> 2013                        |
| 3. Internal (Leaked) concept plans closing prisons | Undated (released November 11 <sup>th</sup> 2013) |
| 4. Internal Departmental policy evaluation         | April 2013                                        |
| 5. Internal Cost-efficiency analysis               | March 5 <sup>th</sup> 2013                        |
| 6. Internal Personnel Policyplan                   | July 1 <sup>st</sup> 2013                         |
| 7. Internal Q&A Masterplan DJI                     | Undated                                           |
| 8. Minutes of Parliamentary meeting                |                                                   |
| a. Minutes debate January 24 <sup>th</sup> 2013    | January 24 <sup>th</sup> 2013                     |
| b. Document number 24587-503                       | April 24 <sup>th</sup> 2013                       |
| c. Document number 24587-507                       | May 27 <sup>th</sup> 2013                         |
| d. Minutes debate March 14 <sup>th</sup> 2013      | March 14 <sup>th</sup> 2013                       |
| e. Minutes debate June 6 <sup>th</sup> 2013        | June 6 <sup>th</sup> 2013                         |
| 9. Letters to parliament                           |                                                   |

|                                                   |                                |
|---------------------------------------------------|--------------------------------|
| a. Document number 24587-490                      | March 22 <sup>nd</sup> 2013    |
| b. Document number 24587-506                      | May 17 <sup>th</sup> 2013      |
| c. Document number 24587-508                      | June 4 <sup>th</sup> 2013      |
| d. Document number 24587-509                      | June 11 <sup>th</sup> 2013     |
| e. Document number 24587-510                      | June 19 <sup>th</sup> 2013     |
| f. Document number 24587-534                      | August 28 <sup>th</sup> 2013   |
| g. Document number 24587-535                      | November 5 <sup>th</sup> 2013  |
| h. Document number 24587-564                      | November 12 <sup>th</sup> 2013 |
| i. Document number 24587-135                      | November 12 <sup>th</sup> 2013 |
| j. Document number 24587-568                      | June 17 <sup>th</sup> 2013     |
| 10. Letter by the Association of Prison Directors | April 4 <sup>th</sup> 2013     |

<sup>i</sup> Most cutback management measures take some time to be realized and hence to pay off, thus we display the amount of money that would structurally (as of 2018) be cut from the budget.

<sup>ii</sup> Most cutback management measures take some time to be realized and hence to pay off, thus we display the amount of money that would structurally (as of 2018) be cut from the budget.

<sup>iii</sup> As interviewees was promised anonymity, the list of respondents only contains more general information on the interviewed persons for this study.
